# Supplementary material
Source: publisher figshare collection journal article supplement (https://acs.figshare.com/ndownloader/files/5709795)
Supplement: Supplementary file 1 [file 5709795]

# ic971557r.cif

data_sad

_audit_creation_method            SHELXL
_chemical_name_systematic
;
 ?
;
_chemical_name_common
(di-t-butylbipyridine)bis(4-pyridylthiolato)platinum(II)
_chemical_formula_moiety          ?
_chemical_formula_structural      ?
_chemical_formula_analytical      ?
_chemical_formula_sum             'C28 H32 N4 Pt S2'
_chemical_formula_weight          683.79

loop_
 _atom_type_symbol
 _atom_type_description
 _atom_type_scat_dispersion_real
 _atom_type_scat_dispersion_imag
 _atom_type_scat_source
 'C'  'C'   0.0033   0.0016
 'International Tables Vol C Tables 4.2.6.8 and 6.1.1.4'
 'H'  'H'   0.0000   0.0000
 'International Tables Vol C Tables 4.2.6.8 and 6.1.1.4'
 'N'  'N'   0.0061   0.0033
 'International Tables Vol C Tables 4.2.6.8 and 6.1.1.4'
 'S'  'S'   0.1246   0.1234
 'International Tables Vol C Tables 4.2.6.8 and 6.1.1.4'
 'Pt'  'Pt'  -1.7033   8.3905
 'International Tables Vol C Tables 4.2.6.8 and 6.1.1.4'

_symmetry_cell_setting            Triclinic
_symmetry_space_group_name_H-M    P-1

loop_
 _symmetry_equiv_pos_as_xyz
 'x, y, z'
 '-x, -y, -z'

_cell_length_a                    9.8484(3)
_cell_length_b                    11.4826(5)
_cell_length_c                    13.3472(5)
_cell_angle_alpha                 113.5590(10)
_cell_angle_beta                  97.0060(10)
_cell_angle_gamma                 95.6940(10)
_cell_volume                      1354.95(9)
_cell_formula_units_Z             2
_cell_measurement_temperature     193(2)
_cell_measurement_reflns_used     ?
_cell_measurement_theta_min       ?
_cell_measurement_theta_max       ?

_exptl_crystal_description        Cluster
_exptl_crystal_colour             Orange
_exptl_crystal_size_max           0.08
_exptl_crystal_size_mid           0.10
_exptl_crystal_size_min           0.12
_exptl_crystal_density_meas       NA
_exptl_crystal_density_diffrn     1.676
_exptl_crystal_density_method     NA
_exptl_crystal_F_000              676
_exptl_absorpt_coefficient_mu     5.356
_exptl_absorpt_correction_type    SADABS
_exptl_absorpt_correction_T_min   0.735216
_exptl_absorpt_correction_T_max   0.927983

_exptl_special_details
;
 ?
;

_diffrn_ambient_temperature       193(2)
_diffrn_radiation_wavelength      0.71073
_diffrn_radiation_type            MoK\a
_diffrn_radiation_source          'normal-focus sealed tube'
_diffrn_radiation_monochromator   graphite
_diffrn_measurement_device        'Siemens SMART'
_diffrn_measurement_method        '\w scans'
_diffrn_standards_number          ?
_diffrn_standards_interval_count  ?
_diffrn_standards_interval_time   ?
_diffrn_standards_decay_%         ?
_diffrn_reflns_number             7998
_diffrn_reflns_av_R_equivalents   0.0370
_diffrn_reflns_av_sigmaI/netI     0.1010
_diffrn_reflns_limit_h_min        -13
_diffrn_reflns_limit_h_max        12
_diffrn_reflns_limit_k_min        -10
_diffrn_reflns_limit_k_max        15
_diffrn_reflns_limit_l_min        -17
_diffrn_reflns_limit_l_max        12
_diffrn_reflns_theta_min          1.69
_diffrn_reflns_theta_max          28.30
_reflns_number_total              5683
_reflns_number_observed           4585
_reflns_observed_criterion        >2sigma(I)

_computing_data_collection        'Siemens XSCANS'
_computing_cell_refinement        'Siemens XSCANS'
_computing_data_reduction         'Siemens SHELXTL'
_computing_structure_solution     'SHELXS-86 (Sheldrick, 1990)'
_computing_structure_refinement   'SHELXL-93 (Sheldrick, 1993)'
_computing_molecular_graphics     'Siemens SHELXTL'
_computing_publication_material   'Siemens SHELXTL'

_refine_special_details
;
 Refinement on F^2^ for ALL reflections except for 0 with very negative F^2^
 or flagged by the user for potential systematic errors.  Weighted R-factors
 wR and all goodnesses of fit S are based on F^2^, conventional R-factors R
 are based on F, with F set to zero for negative F^2^. The observed criterion
 of F^2^ > 2sigma(F^2^) is used only for calculating _R_factor_obs etc. and is
 not relevant to the choice of reflections for refinement.  R-factors based
 on F^2^ are statistically about twice as large as those based on F, and R-
 factors based on ALL data will be even larger.
;

_refine_ls_structure_factor_coef  Fsqd
_refine_ls_matrix_type            full
_refine_ls_weighting_scheme
 'calc w=1/[\s^2^(Fo^2^)+(0.0362P)^2^+14.1414P] where P=(Fo^2^+2Fc^2^)/3'
_atom_sites_solution_primary      direct
_atom_sites_solution_secondary    difmap
_atom_sites_solution_hydrogens    geom
_refine_ls_hydrogen_treatment     ?
_refine_ls_extinction_method      none
_refine_ls_extinction_coef        ?
_refine_ls_number_reflns          5683
_refine_ls_number_parameters      314
_refine_ls_number_restraints      0
_refine_ls_R_factor_all           0.0920
_refine_ls_R_factor_obs           0.0679
_refine_ls_wR_factor_all          0.1356
_refine_ls_wR_factor_obs          0.1222
_refine_ls_goodness_of_fit_all    1.017
_refine_ls_goodness_of_fit_obs    1.025
_refine_ls_restrained_S_all       1.017
_refine_ls_restrained_S_obs       1.025
_refine_ls_shift/esd_max          -0.051
_refine_ls_shift/esd_mean         0.003

loop_
 _atom_site_label
 _atom_site_type_symbol
 _atom_site_fract_x
 _atom_site_fract_y
 _atom_site_fract_z
 _atom_site_U_iso_or_equiv
 _atom_site_thermal_displace_type
 _atom_site_occupancy
 _atom_site_calc_flag
 _atom_site_refinement_flags
 _atom_site_disorder_group
Pt Pt 0.87016(4) 0.29124(4) -0.00485(4) 0.02846(13) Uani 1 d . .
S1 S 0.7665(3) 0.1480(3) -0.1805(2) 0.0383(7) Uani 1 d . .
S2 S 1.0704(3) 0.3139(3) -0.0714(2) 0.0371(6) Uani 1 d . .
N1 N 0.9475(7) 0.4263(8) 0.1544(7) 0.023(2) Uani 1 d . .
N2 N 0.7015(8) 0.2820(8) 0.0703(7) 0.030(2) Uani 1 d . .
N3 N 0.4274(11) 0.3295(12) -0.3053(10) 0.060(3) Uani 1 d . .
N4 N 1.2458(9) -0.0642(10) -0.1817(8) 0.042(2) Uani 1 d . .
C11 C 1.0709(10) 0.5013(10) 0.1909(9) 0.033(2) Uani 1 d . .
H11A H 1.1378(10) 0.4837(10) 0.1435(9) 0.040 Uiso 1 calc R .
C21 C 1.1064(10) 0.6025(10) 0.2932(9) 0.034(2) Uani 1 d . .
H21A H 1.1961(10) 0.6530(10) 0.3150(9) 0.041 Uiso 1 calc R .
C31 C 1.0123(10) 0.6315(10) 0.3646(9) 0.033(2) Uani 1 d . .
C41 C 0.8830(9) 0.5529(10) 0.3265(9) 0.031(2) Uani 1 d . .
H41A H 0.8149(9) 0.5694(10) 0.3730(9) 0.038 Uiso 1 calc R .
C51 C 0.8517(10) 0.4518(10) 0.2230(8) 0.030(2) Uani 1 d . .
C61 C 0.7190(10) 0.3634(9) 0.1791(8) 0.026(2) Uani 1 d . .
C71 C 0.6193(10) 0.3626(10) 0.2435(8) 0.030(2) Uani 1 d . .
H71A H 0.6359(10) 0.4200(10) 0.3199(8) 0.036 Uiso 1 calc R .
C81 C 0.4929(9) 0.2766(9) 0.1954(8) 0.027(2) Uani 1 d . .
C91 C 0.4777(10) 0.1944(11) 0.0849(9) 0.036(2) Uani 1 d . .
H91A H 0.3942(10) 0.1351(11) 0.0489(9) 0.043 Uiso 1 calc R .
C101 C 0.5819(10) 0.1974(10) 0.0266(9) 0.032(2) Uani 1 d . .
H10A H 0.5696(10) 0.1367(10) -0.0486(9) 0.038 Uiso 1 calc R .
C111 C 1.0502(11) 0.7416(12) 0.4798(9) 0.042(3) Uani 1 d . .
C121 C 1.0736(30) 0.6846(27) 0.5693(23) 0.084(9) Uiso 0.63(3) d P .
C122 C 1.1783(40) 0.6975(36) 0.5383(30) 0.056(11) Uiso 0.37(3) d P .
C131 C 0.9194(23) 0.8202(22) 0.5106(18) 0.061(7) Uiso 0.63(3) d P .
C132 C 0.9440(46) 0.7525(45) 0.5464(37) 0.076(14) Uiso 0.37(3) d P .
C141 C 1.1781(25) 0.8409(22) 0.4993(19) 0.060(7) Uiso 0.63(3) d P .
C142 C 1.1144(43) 0.8670(38) 0.4664(33) 0.059(11) Uiso 0.37(3) d P .
C151 C 0.3841(10) 0.2755(10) 0.2679(9) 0.033(2) Uani 1 d . .
C161 C 0.2427(11) 0.2051(13) 0.1981(10) 0.052(3) Uani 1 d . .
H16A H 0.2506(11) 0.1169(13) 0.1487(10) 0.079 Uiso 1 calc R .
H16B H 0.2095(11) 0.2503(13) 0.1536(10) 0.079 Uiso 1 calc R .
H16C H 0.1770(11) 0.2028(13) 0.2471(10) 0.079 Uiso 1 calc R .
C171 C 0.4338(12) 0.2076(14) 0.3409(11) 0.060(4) Uani 1 d . .
H17A H 0.4444(12) 0.1195(14) 0.2935(11) 0.090 Uiso 1 calc R .
H17B H 0.3655(12) 0.2052(14) 0.3880(11) 0.090 Uiso 1 calc R .
H17C H 0.5232(12) 0.2548(14) 0.3879(11) 0.090 Uiso 1 calc R .
C181 C 0.3699(12) 0.4120(12) 0.3436(11) 0.055(3) Uani 1 d . .
H18A H 0.4604(12) 0.4584(12) 0.3889(11) 0.083 Uiso 1 calc R .
H18B H 0.3039(12) 0.4093(12) 0.3923(11) 0.083 Uiso 1 calc R .
H18C H 0.3362(12) 0.4564(12) 0.2986(11) 0.083 Uiso 1 calc R .
C12 C 0.6373(10) 0.2200(11) -0.2232(9) 0.035(2) Uani 1 d . .
C22 C 0.6059(11) 0.3406(11) -0.1606(10) 0.041(3) Uani 1 d . .
H22A H 0.6558(11) 0.3894(11) -0.0873(10) 0.049 Uiso 1 calc R .
C32 C 0.5040(12) 0.3899(14) -0.2030(11) 0.051(3) Uani 1 d . .
H32A H 0.4864(12) 0.4726(14) -0.1568(11) 0.061 Uiso 1 calc R .
C42 C 0.4566(12) 0.2119(15) -0.3642(11) 0.056(4) Uani 1 d . .
H42A H 0.4034(12) 0.1643(15) -0.4365(11) 0.067 Uiso 1 calc R .
C52 C 0.5559(11) 0.1548(12) -0.3292(10) 0.044(3) Uani 1 d . .
H52A H 0.5696(11) 0.0711(12) -0.3765(10) 0.053 Uiso 1 calc R .
C13 C 1.1285(9) 0.1651(10) -0.1163(8) 0.028(2) Uani 1 d . .
C23 C 1.2426(11) 0.1517(11) -0.1719(8) 0.040(3) Uani 1 d . .
H23A H 1.2829(11) 0.2196(11) -0.1878(8) 0.048 Uiso 1 calc R .
C33 C 1.2941(12) 0.0376(12) -0.2026(10) 0.046(3) Uani 1 d . .
H33A H 1.3697(12) 0.0293(12) -0.2416(10) 0.055 Uiso 1 calc R .
C43 C 1.1349(10) -0.0471(10) -0.1308(9) 0.035(2) Uani 1 d . .
H43A H 1.0956(10) -0.1157(10) -0.1153(9) 0.042 Uiso 1 calc R .
C53 C 1.0747(10) 0.0604(10) -0.0997(9) 0.035(2) Uani 1 d . .
H53A H 0.9947(10) 0.0633(10) -0.0662(9) 0.043 Uiso 1 calc R .

loop_
 _atom_site_aniso_label
 _atom_site_aniso_U_11
 _atom_site_aniso_U_22
 _atom_site_aniso_U_33
 _atom_site_aniso_U_23
 _atom_site_aniso_U_13
 _atom_site_aniso_U_12
Pt 0.0261(2) 0.0310(2) 0.0330(2) 0.0165(2) 0.00827(15) 0.00756(15)
S1 0.041(2) 0.040(2) 0.035(2) 0.0145(14) 0.0075(13) 0.0119(13)
S2 0.0376(15) 0.0324(15) 0.049(2) 0.0210(14) 0.0204(13) 0.0090(12)
N1 0.012(4) 0.030(5) 0.035(5) 0.021(4) 0.007(3) 0.005(3)
N2 0.023(4) 0.043(5) 0.029(5) 0.020(4) 0.008(3) 0.007(4)
N3 0.047(6) 0.079(9) 0.080(8) 0.060(8) 0.004(6) 0.017(6)
N4 0.034(5) 0.052(6) 0.045(6) 0.022(5) 0.012(4) 0.007(5)
C11 0.024(5) 0.037(6) 0.045(6) 0.021(5) 0.017(5) 0.004(5)
C21 0.020(5) 0.037(6) 0.046(6) 0.022(5) 0.002(4) 0.001(4)
C31 0.023(5) 0.040(6) 0.036(6) 0.019(5) -0.002(4) 0.001(4)
C41 0.015(5) 0.044(6) 0.040(6) 0.023(5) 0.009(4) 0.002(4)
C51 0.026(5) 0.042(6) 0.029(5) 0.022(5) 0.004(4) 0.011(5)
C61 0.025(5) 0.029(5) 0.029(5) 0.015(5) 0.007(4) 0.011(4)
C71 0.025(5) 0.034(6) 0.031(5) 0.013(5) 0.006(4) 0.008(4)
C81 0.020(5) 0.023(5) 0.040(6) 0.016(5) 0.000(4) 0.004(4)
C91 0.027(5) 0.041(6) 0.036(6) 0.016(5) 0.005(5) -0.003(5)
C101 0.032(5) 0.029(6) 0.033(6) 0.014(5) 0.000(4) 0.002(4)
C111 0.029(6) 0.060(8) 0.031(6) 0.016(6) 0.005(5) -0.004(5)
C151 0.018(5) 0.033(6) 0.041(6) 0.012(5) 0.007(4) -0.005(4)
C161 0.023(6) 0.077(10) 0.055(8) 0.025(7) 0.019(5) -0.004(6)
C171 0.042(7) 0.101(11) 0.078(9) 0.077(9) 0.022(7) 0.014(7)
C181 0.034(6) 0.045(8) 0.078(9) 0.014(7) 0.028(6) 0.001(6)
C12 0.031(5) 0.046(7) 0.035(6) 0.027(5) 0.005(5) -0.001(5)
C22 0.035(6) 0.048(7) 0.045(7) 0.028(6) 0.001(5) 0.000(5)
C32 0.036(6) 0.077(10) 0.067(9) 0.056(8) 0.013(6) 0.019(6)
C42 0.036(7) 0.092(11) 0.060(8) 0.058(9) -0.009(6) 0.000(7)
C52 0.039(6) 0.055(8) 0.044(7) 0.027(6) 0.015(5) -0.004(6)
C13 0.021(5) 0.033(6) 0.028(5) 0.009(5) 0.011(4) 0.006(4)
C23 0.037(6) 0.048(7) 0.031(6) 0.014(5) 0.010(5) -0.009(5)
C33 0.045(7) 0.041(7) 0.049(7) 0.012(6) 0.014(6) 0.015(6)
C43 0.032(6) 0.027(6) 0.043(6) 0.014(5) 0.003(5) 0.003(5)
C53 0.022(5) 0.042(7) 0.043(6) 0.018(5) 0.006(5) 0.006(5)

_geom_special_details
;
 All esds (except the esd in the dihedral angle between two l.s. planes)
 are estimated using the full covariance matrix.  The cell esds are taken
 into account individually in the estimation of esds in distances, angles
 and torsion angles; correlations between esds in cell parameters are only
 used when they are defined by crystal symmetry.  An approximate (isotropic)
 treatment of cell esds is used for estimating esds involving l.s. planes.
;

loop_
 _geom_bond_atom_site_label_1
 _geom_bond_atom_site_label_2
 _geom_bond_distance
 _geom_bond_site_symmetry_2
 _geom_bond_publ_flag
Pt N2 2.057(8) . ?
Pt N1 2.059(8) . ?
Pt S1 2.291(3) . ?
Pt S2 2.293(3) . ?
S1 C12 1.742(11) . ?
S2 C13 1.751(10) . ?
N1 C11 1.330(12) . ?
N1 C51 1.366(12) . ?
N2 C101 1.350(12) . ?
N2 C61 1.355(12) . ?
N3 C42 1.34(2) . ?
N3 C32 1.34(2) . ?
N4 C43 1.346(13) . ?
N4 C33 1.361(15) . ?
C11 C21 1.367(15) . ?
C21 C31 1.379(14) . ?
C31 C41 1.394(13) . ?
C31 C111 1.521(15) . ?
C41 C51 1.376(14) . ?
C51 C61 1.468(14) . ?
C61 C71 1.382(13) . ?
C71 C81 1.411(13) . ?
C81 C91 1.376(14) . ?
C81 C151 1.531(13) . ?
C91 C101 1.367(14) . ?
C111 C132 1.44(4) . ?
C111 C141 1.53(2) . ?
C111 C121 1.58(3) . ?
C111 C122 1.63(4) . ?
C111 C142 1.60(4) . ?
C111 C131 1.64(2) . ?
C121 C122 1.17(4) . ?
C121 C132 1.62(5) . ?
C122 C141 1.91(4) . ?
C131 C132 1.09(4) . ?
C141 C142 0.87(4) . ?
C151 C181 1.52(2) . ?
C151 C161 1.523(14) . ?
C151 C171 1.538(15) . ?
C12 C22 1.39(2) . ?
C12 C52 1.401(15) . ?
C22 C32 1.371(15) . ?
C42 C52 1.37(2) . ?
C13 C53 1.375(14) . ?
C13 C23 1.408(13) . ?
C23 C33 1.38(2) . ?
C43 C53 1.357(14) . ?

loop_
 _geom_angle_atom_site_label_1
 _geom_angle_atom_site_label_2
 _geom_angle_atom_site_label_3
 _geom_angle
 _geom_angle_site_symmetry_1
 _geom_angle_site_symmetry_3
 _geom_angle_publ_flag
N2 Pt N1 79.5(3) . . ?
N2 Pt S1 96.7(2) . . ?
N1 Pt S1 175.0(2) . . ?
N2 Pt S2 174.4(2) . . ?
N1 Pt S2 94.9(2) . . ?
S1 Pt S2 88.88(10) . . ?
C12 S1 Pt 106.3(4) . . ?
C13 S2 Pt 107.4(3) . . ?
C11 N1 C51 118.1(9) . . ?
C11 N1 Pt 127.1(7) . . ?
C51 N1 Pt 114.1(6) . . ?
C101 N2 C61 116.9(8) . . ?
C101 N2 Pt 127.6(7) . . ?
C61 N2 Pt 115.2(6) . . ?
C42 N3 C32 114.0(10) . . ?
C43 N4 C33 113.6(10) . . ?
N1 C11 C21 123.4(9) . . ?
C31 C21 C11 120.2(9) . . ?
C21 C31 C41 116.4(10) . . ?
C21 C31 C111 121.3(9) . . ?
C41 C31 C111 122.3(9) . . ?
C51 C41 C31 121.4(9) . . ?
N1 C51 C41 120.4(9) . . ?
N1 C51 C61 115.4(9) . . ?
C41 C51 C61 124.2(9) . . ?
N2 C61 C71 122.3(9) . . ?
N2 C61 C51 114.8(8) . . ?
C71 C61 C51 122.9(9) . . ?
C61 C71 C81 119.9(9) . . ?
C91 C81 C71 116.7(9) . . ?
C91 C81 C151 123.8(9) . . ?
C71 C81 C151 119.4(9) . . ?
C81 C91 C101 120.5(10) . . ?
N2 C101 C91 123.5(10) . . ?
C132 C111 C31 114.0(20) . . ?
C132 C111 C141 128.2(22) . . ?
C31 C111 C141 116.3(11) . . ?
C132 C111 C121 64.7(20) . . ?
C31 C111 C121 109.2(13) . . ?
C141 C111 C121 108.2(15) . . ?
C132 C111 C122 106.2(23) . . ?
C31 C111 C122 102.5(15) . . ?
C141 C111 C122 74.4(16) . . ?
C121 C111 C122 42.9(15) . . ?
C132 C111 C142 118.4(25) . . ?
C31 C111 C142 107.9(16) . . ?
C141 C111 C142 32.0(14) . . ?
C121 C111 C142 136.2(20) . . ?
C122 C111 C142 106.4(21) . . ?
C132 C111 C131 40.9(18) . . ?
C31 C111 C131 110.6(11) . . ?
C141 C111 C131 107.5(14) . . ?
C121 C111 C131 104.4(14) . . ?
C122 C111 C131 140.7(16) . . ?
C142 C111 C131 83.3(18) . . ?
C122 C121 C111 70.8(24) . . ?
C122 C121 C132 122.2(33) . . ?
C111 C121 C132 53.4(19) . . ?
C121 C122 C111 66.3(23) . . ?
C121 C122 C141 107.0(29) . . ?
C111 C122 C141 50.5(13) . . ?
C132 C131 C111 59.3(26) . . ?
C131 C132 C111 79.8(31) . . ?
C131 C132 C121 139.1(42) . . ?
C111 C132 C121 61.9(20) . . ?
C142 C141 C111 78.1(33) . . ?
C142 C141 C122 133.2(38) . . ?
C111 C141 C122 55.1(14) . . ?
C141 C142 C111 69.8(32) . . ?
C181 C151 C161 108.7(9) . . ?
C181 C151 C171 108.2(10) . . ?
C161 C151 C171 109.5(10) . . ?
C181 C151 C81 110.7(8) . . ?
C161 C151 C81 111.8(9) . . ?
C171 C151 C81 107.8(8) . . ?
C22 C12 C52 114.9(10) . . ?
C22 C12 S1 125.6(8) . . ?
C52 C12 S1 119.5(9) . . ?
C32 C22 C12 121.0(11) . . ?
C22 C32 N3 124.5(13) . . ?
N3 C42 C52 125.7(12) . . ?
C42 C52 C12 119.8(12) . . ?
C53 C13 C23 116.7(10) . . ?
C53 C13 S2 125.7(7) . . ?
C23 C13 S2 117.5(8) . . ?
C33 C23 C13 118.3(10) . . ?
C23 C33 N4 125.4(11) . . ?
N4 C43 C53 125.2(10) . . ?
C43 C53 C13 120.6(10) . . ?

_refine_diff_density_max    1.002
_refine_diff_density_min   -1.112
_refine_diff_density_rms    0.215
